# Supplementary material for: Nanospot welding of carbon nanotubes using near-field enhancement effect of AFM probe irradiated by optical fiber probe laser
Source: Royal Society of Chemistry journal article supplement (doi:10.1039/c4ra10117k), 2015-01-01
Supplement: c4ra10117k1.pdf [file c4ra10117k1.pdf]

## Supporting Information

### Nanospot welding of carbon nanotubes using near-field enhancement effect of AFM probe irradiated by optical fiber probe laser

Lijun Yang<sup>a,1</sup>, Jianlei Cui<sup>a,b,c,1,\*</sup>, Yang Wang<sup>a,\*</sup>, Xuesong Mei<sup>b</sup>, Wenjun Wang<sup>b</sup>, Kedian Wang<sup>b</sup>,  
Chaojian Hou<sup>a</sup>

<sup>a</sup>)Key Laboratory of Micro-systems and Micro-structures Manufacturing, Ministry of Education,  
Harbin Institute of Technology, Harbin 150001, P. R. China

<sup>b</sup>)State Key Laboratory for Manufacturing Systems Engineering, Xi'an Jiaotong University, Xi'an  
710049, P. R. China

<sup>c</sup>)State Key Laboratory of Surface Physics and Department of Physics, Fudan University,  
Shanghai 200433, P. R. China

<sup>1</sup> Authors contributed equally to this work.

E-mail: [cjlxjtu@mail.xjtu.edu.cn](mailto:cjlxjtu@mail.xjtu.edu.cn)

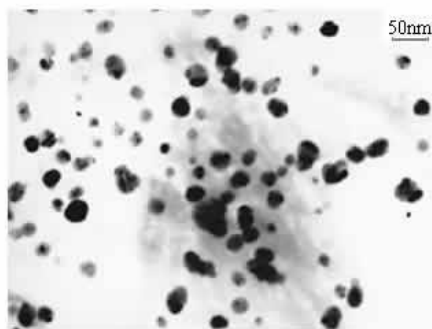

**Figure S1.** The morphology of silver nanoparticles

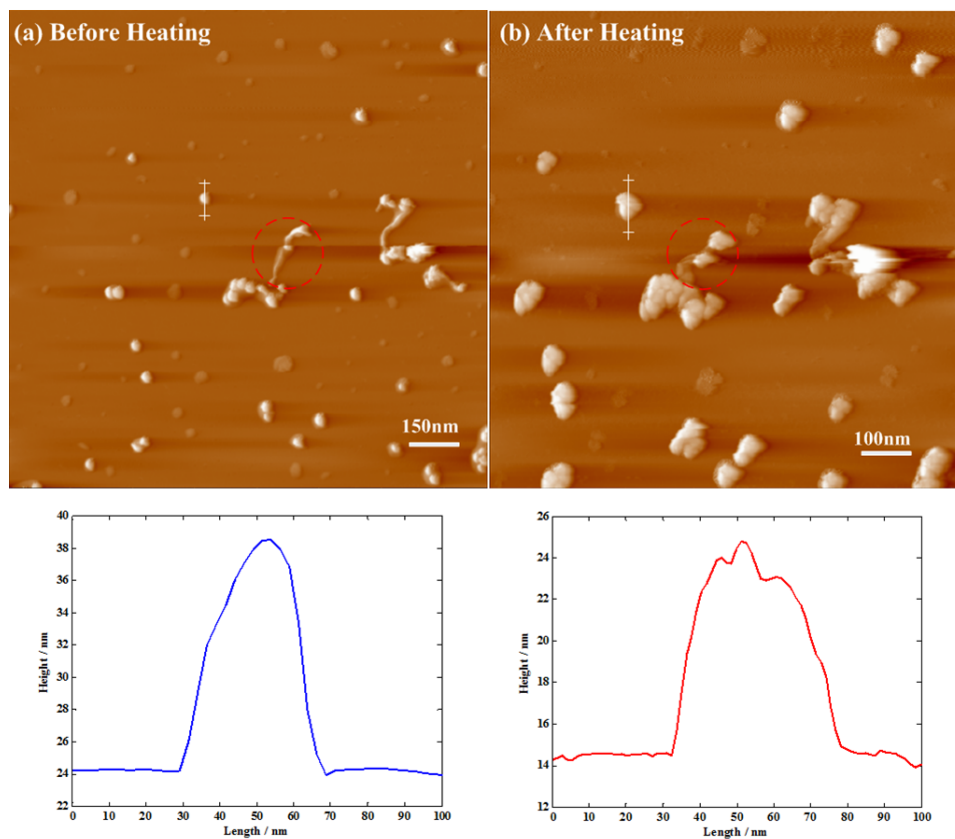

**Figure S2.** Experimental interconnection of carbon nanotubes (a) before heating and (b) after heating treatment based on AFM probe tip illuminated by fiber probe laser (64mW) with the corresponding height sizes

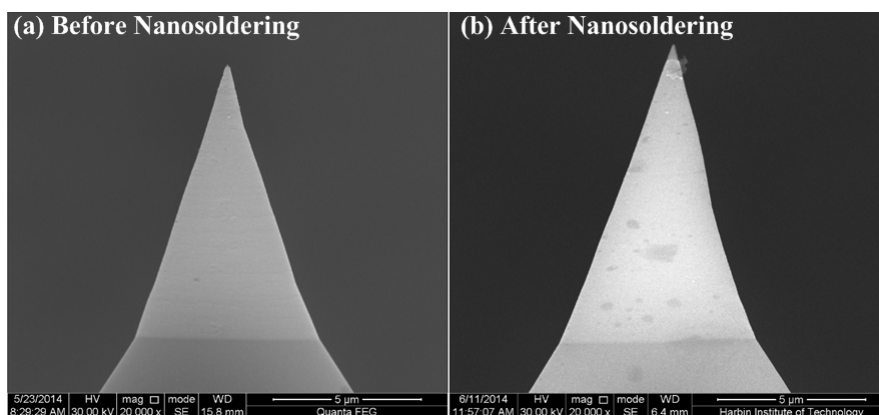

**Figure S3.** SEM images of AFM probe tip morphology (a) before and (b) after nanosoldering
